# Supplementary material
Source: PubMed Central journal article supplement (PMC5062325)
Supplement: supp_msw171_SI.pdf [file supp_msw171_SI.pdf]

# Supplementary Information for: Extensively parameterized mutation–selection models reliably capture site-specific selective constraint

Stephanie J. Spielman<sup>1,2\*</sup> and Claus O. Wilke<sup>1</sup>

Address:

<sup>1</sup>Department of Integrative Biology, Center for Computational Biology and Bioinformatics, and Institute for Cellular and Molecular Biology. The University of Texas at Austin, Austin, TX.

Current Address:

<sup>2</sup>Institute for Genomics and Evolutionary Medicine. Temple University, Philadelphia, PA.

\*Corresponding author

Email: stephanie.spielman@gmail.com

## Supplementary Figures

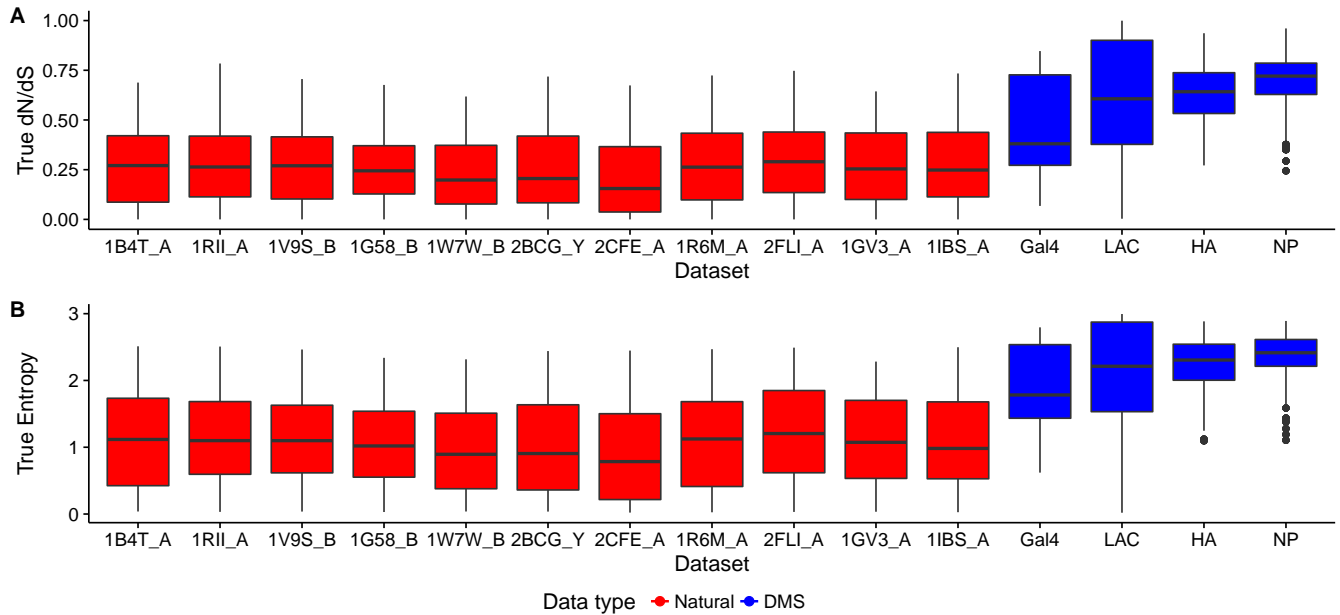

**Figure S1** Distributions of true site-specific  $dN/dS$  and entropies across simulation parameterizations.

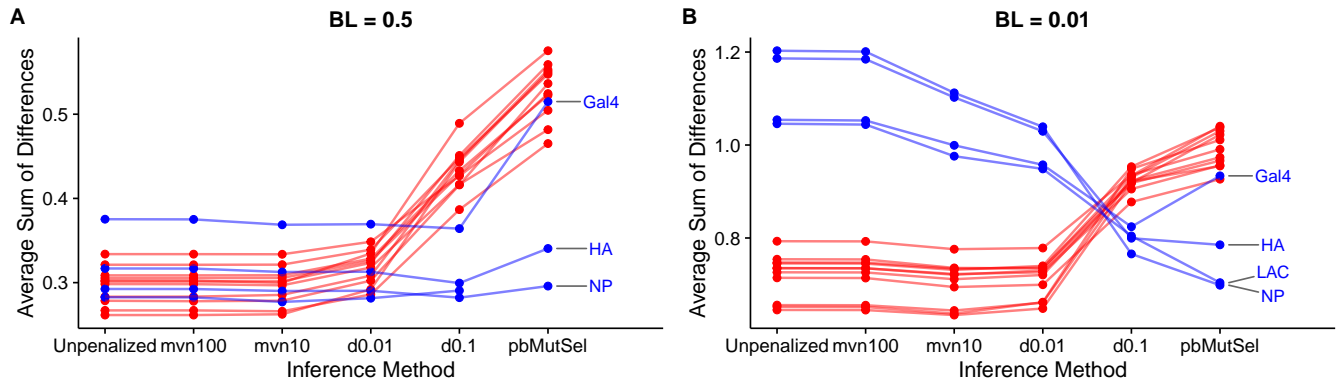

**Figure S2** Sum of absolute differences between true and inferred stationary amino-acid frequencies.

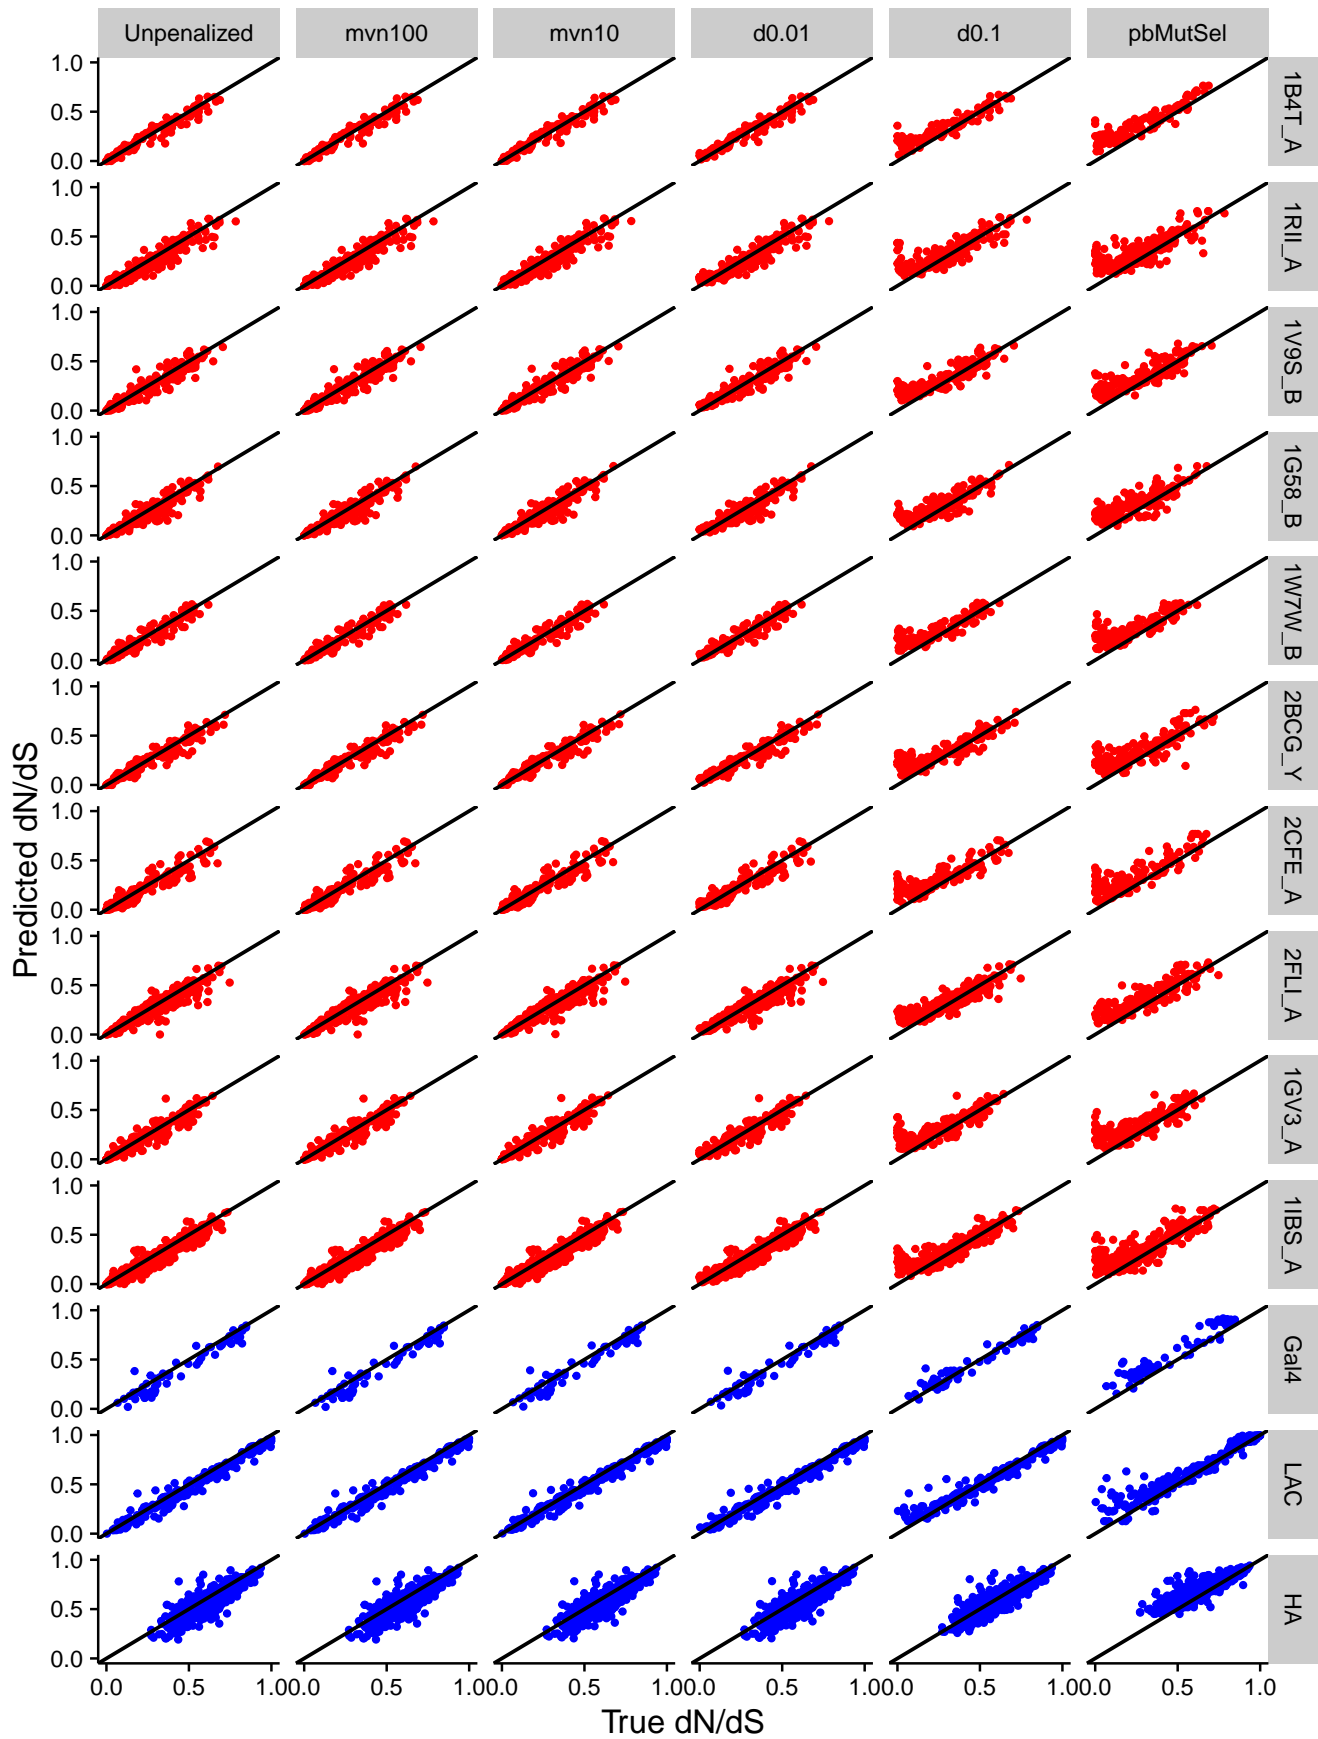

**Figure S3** Scatterplots of predicted vs. true  $dN/dS$  ratios, for all inference methods, across BL=0.5 simulations. Each line indicates the  $y = x$  line.

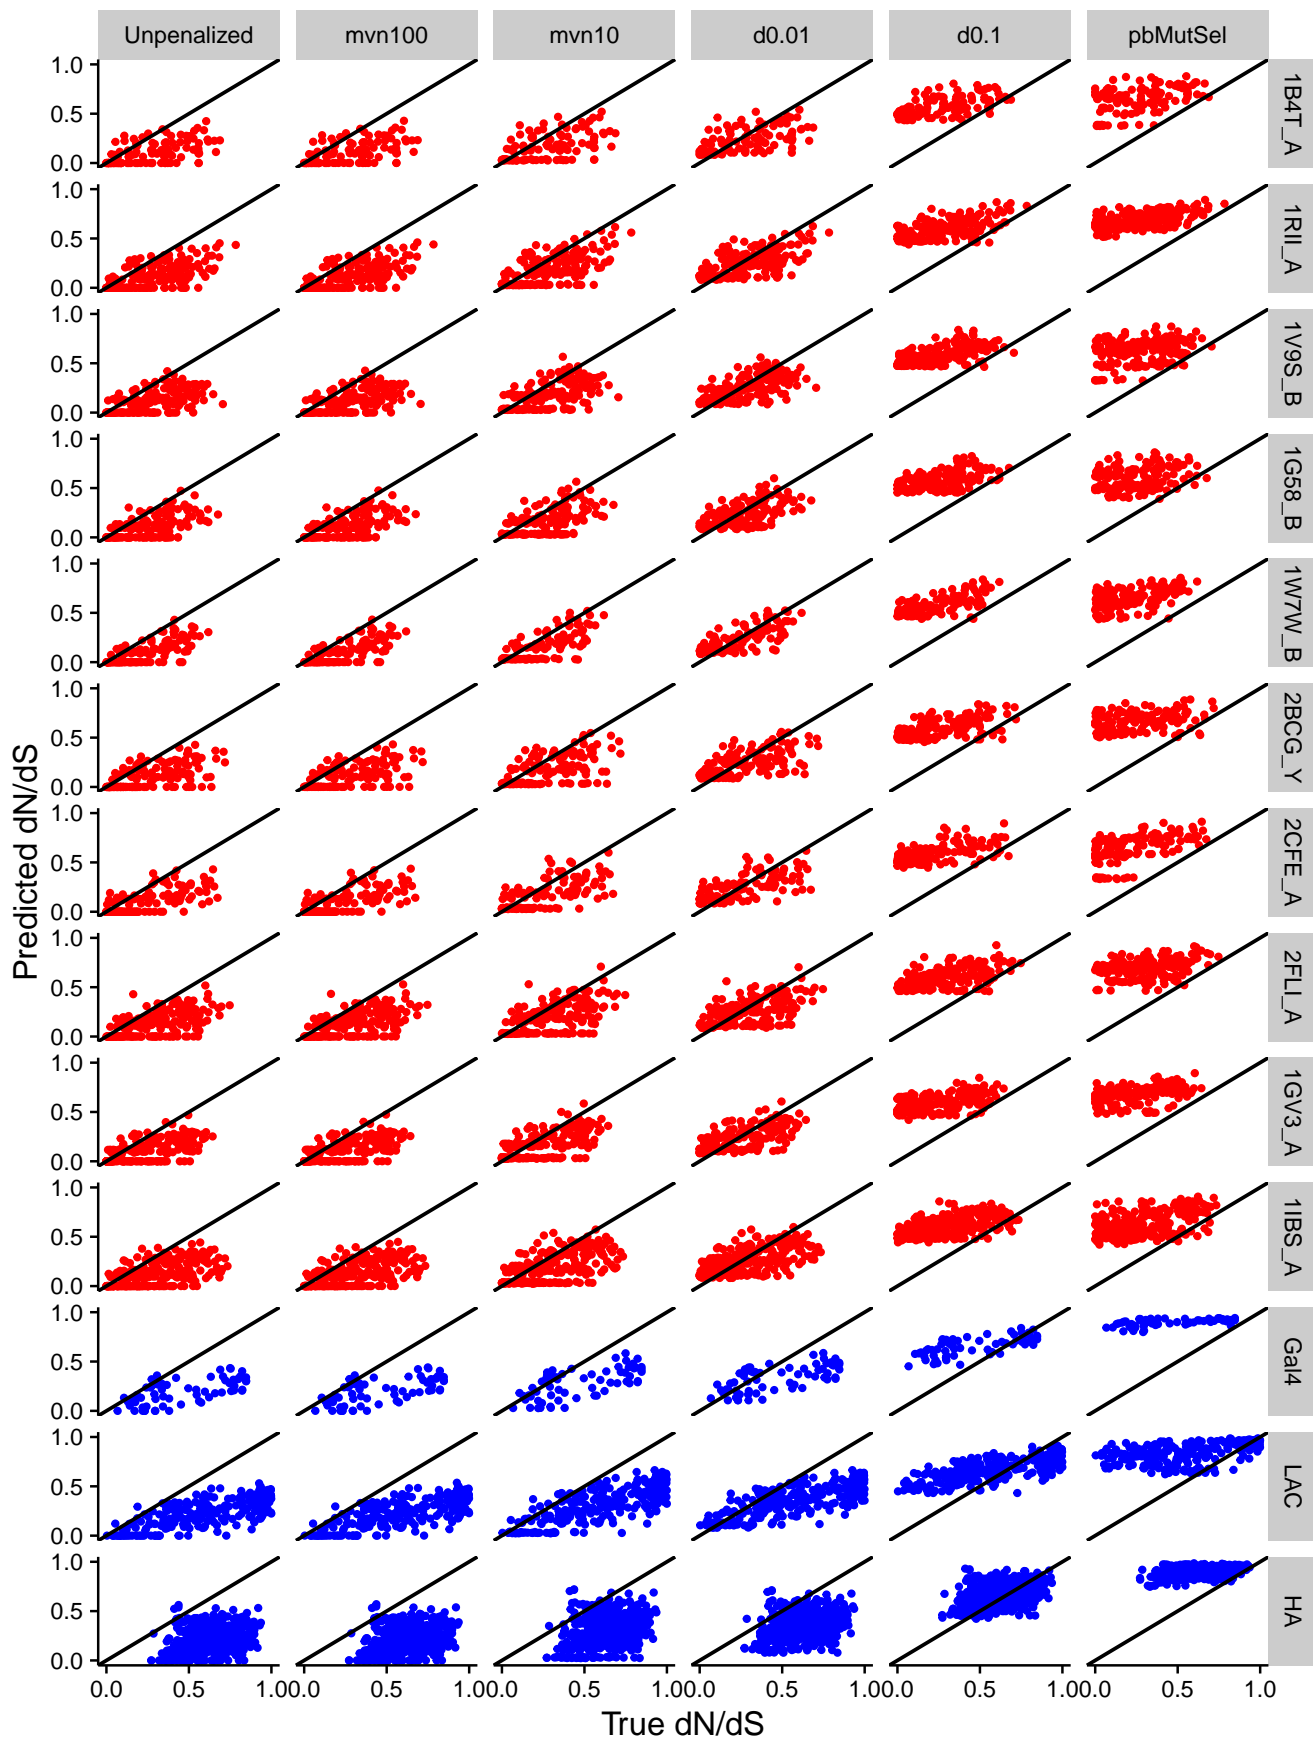

**Figure S4** Scatterplots of predicted vs. true  $dN/dS$  ratios, for all inference methods, across  $BL=0.01$  simulations. Each line indicates the  $y = x$  line.

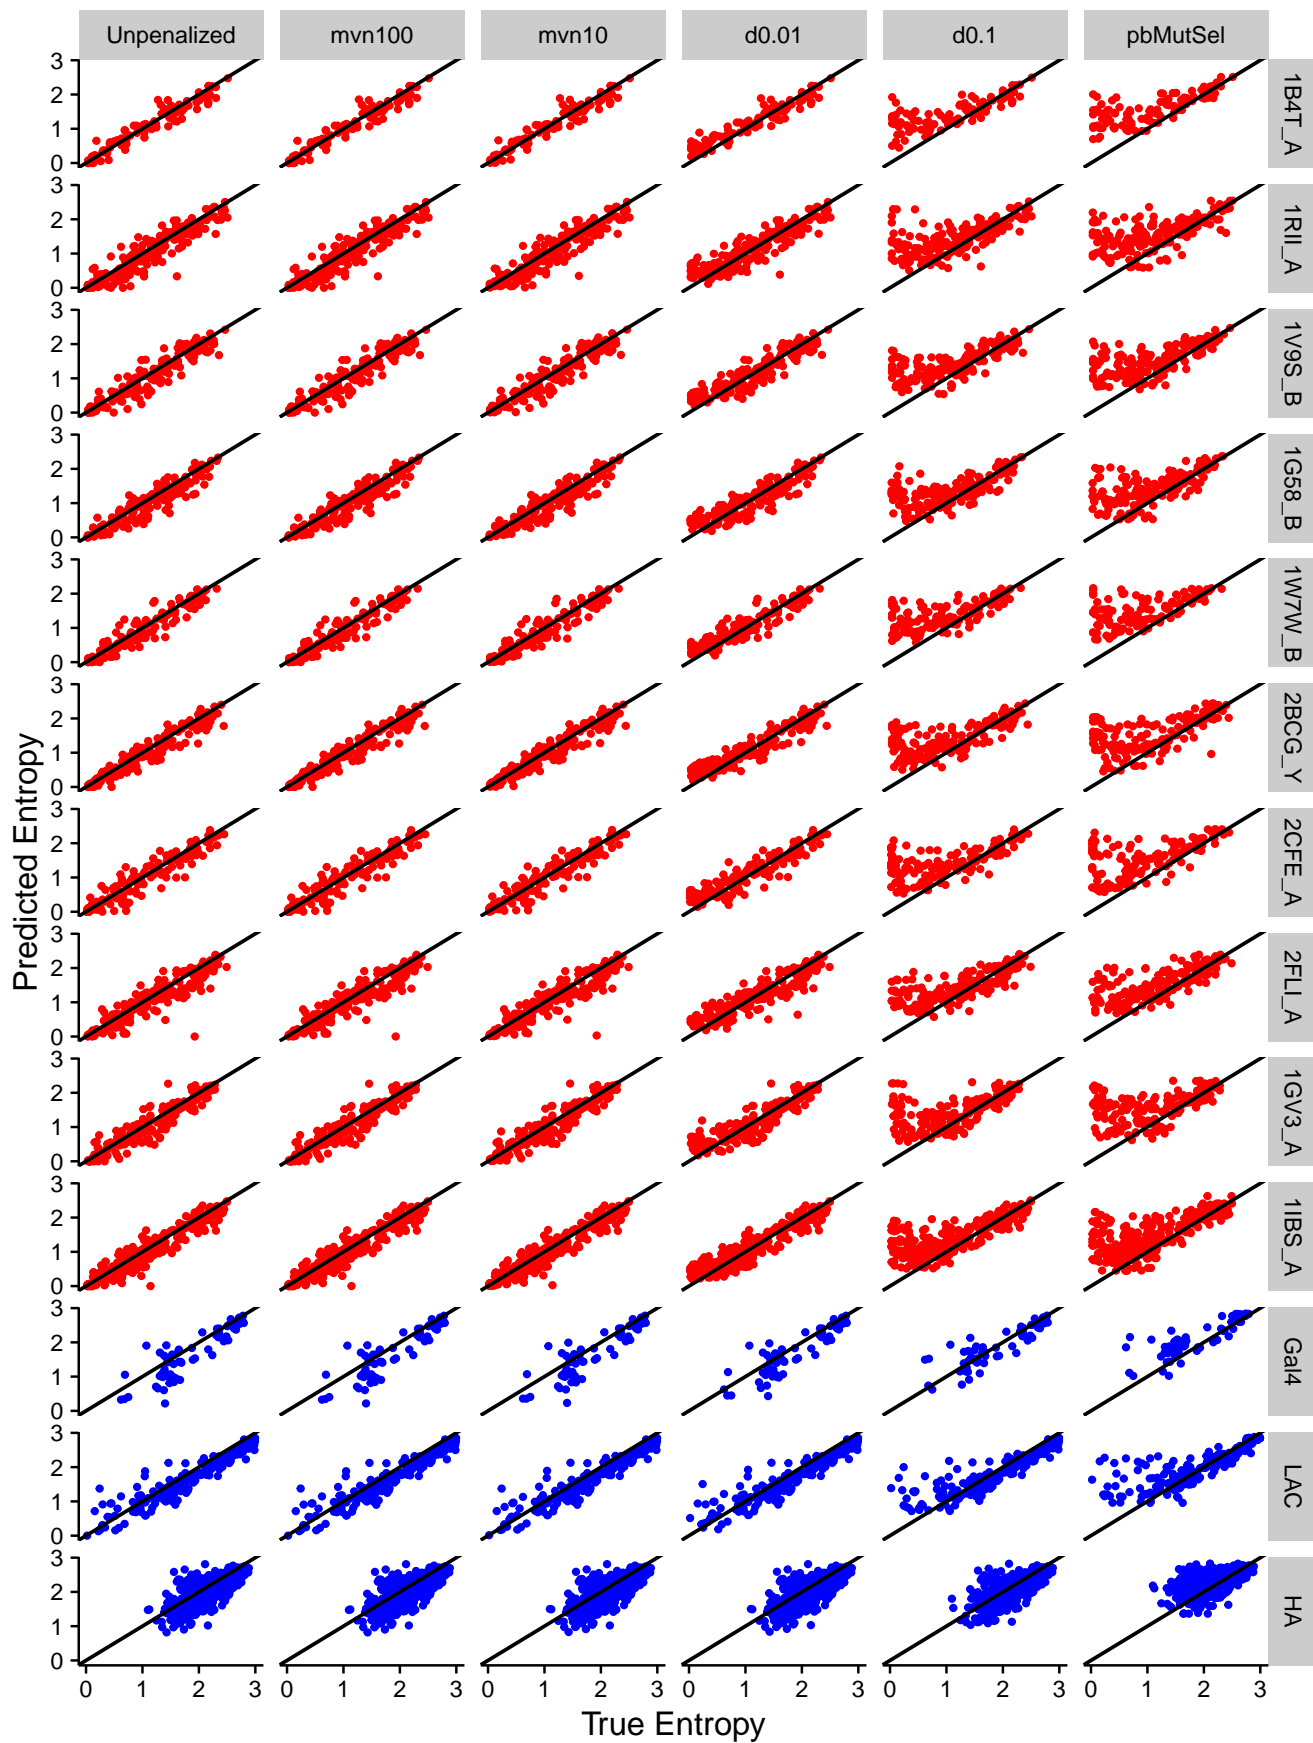

**Figure S5** Scatterplots of predicted vs. true entropies, for all inference methods, across BL=0.5 simulations. Each line indicates the  $y = x$  line.

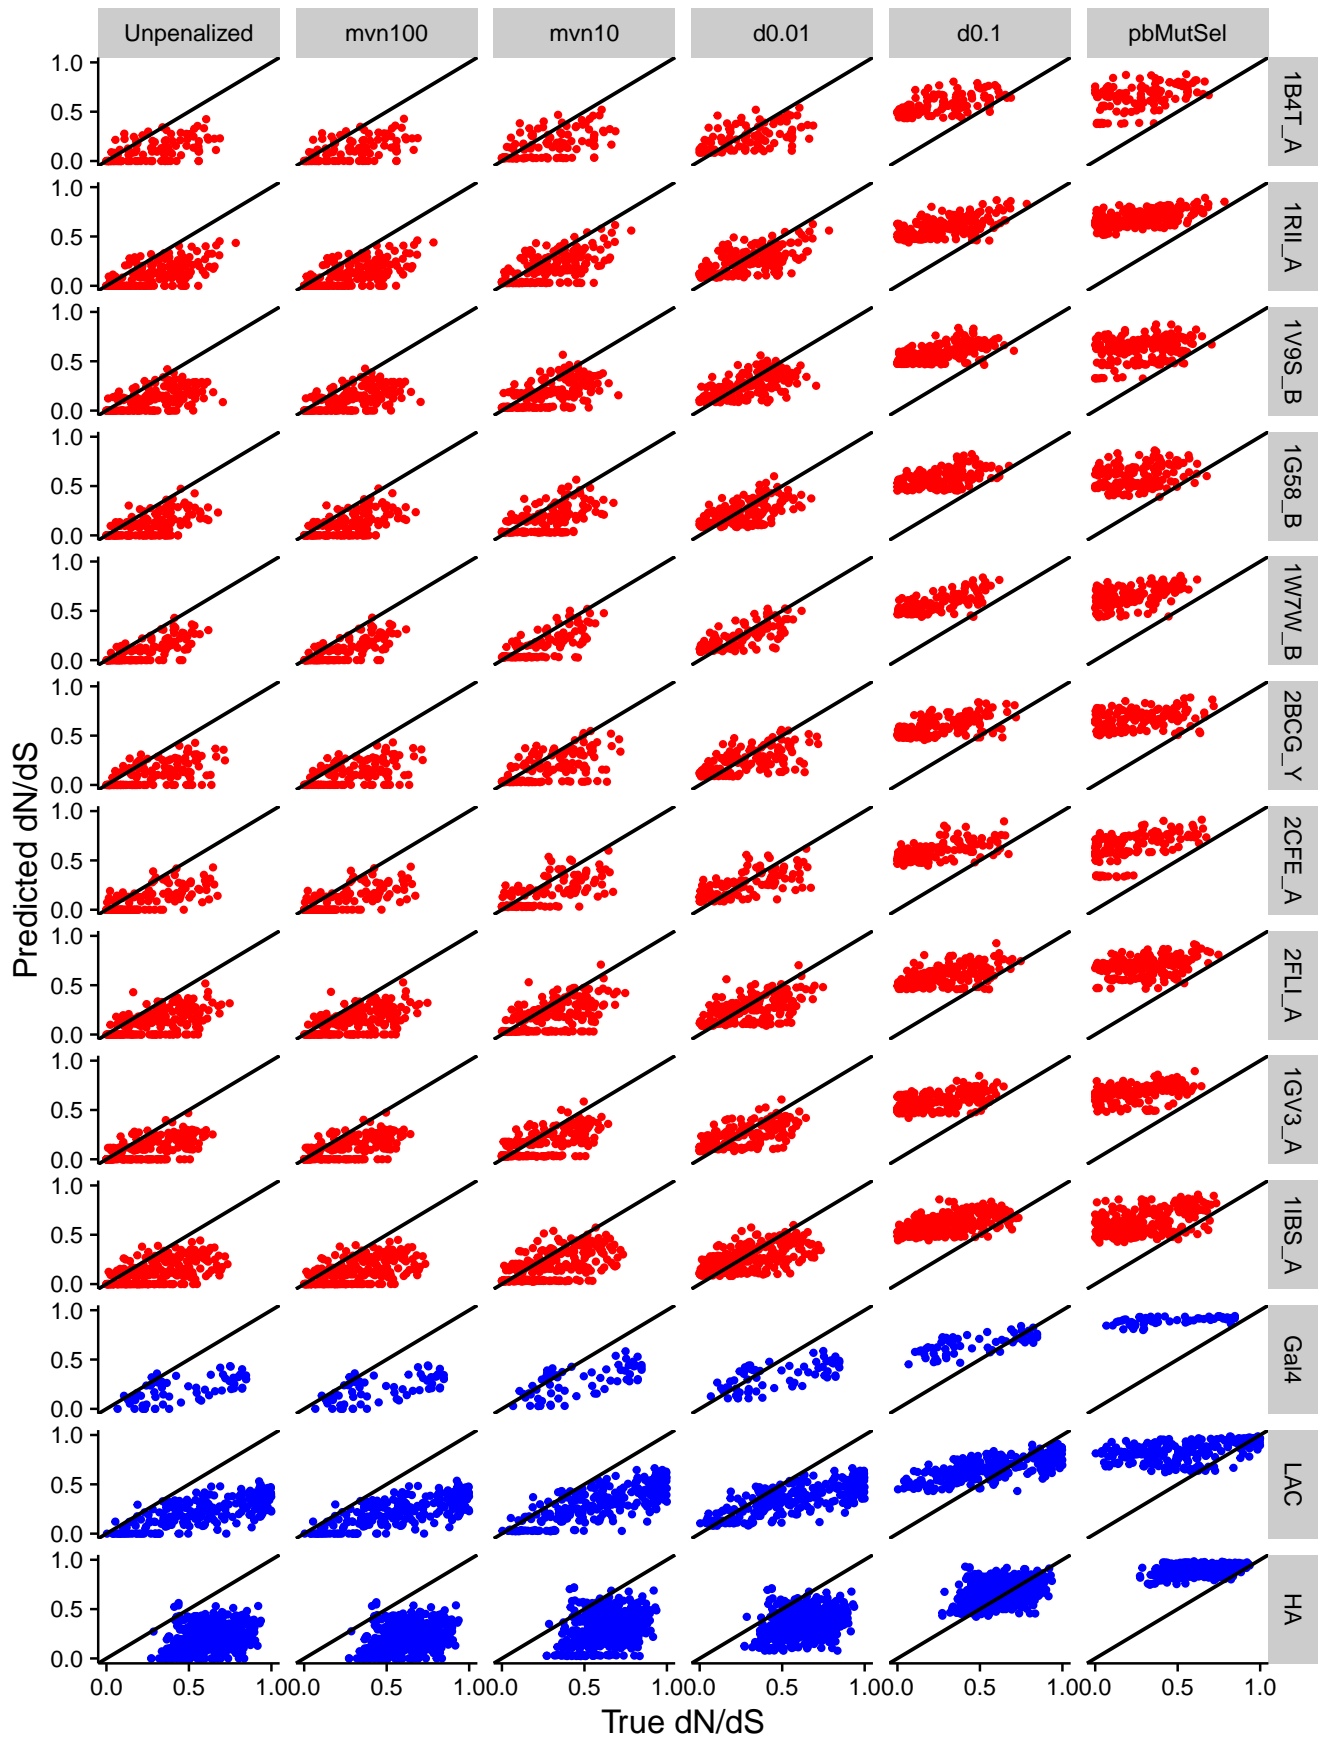

**Figure S6** Scatterplots of predicted vs. true entropies, for all inference methods, across BL=0.01 simulations. Each line indicates the  $y = x$  line.

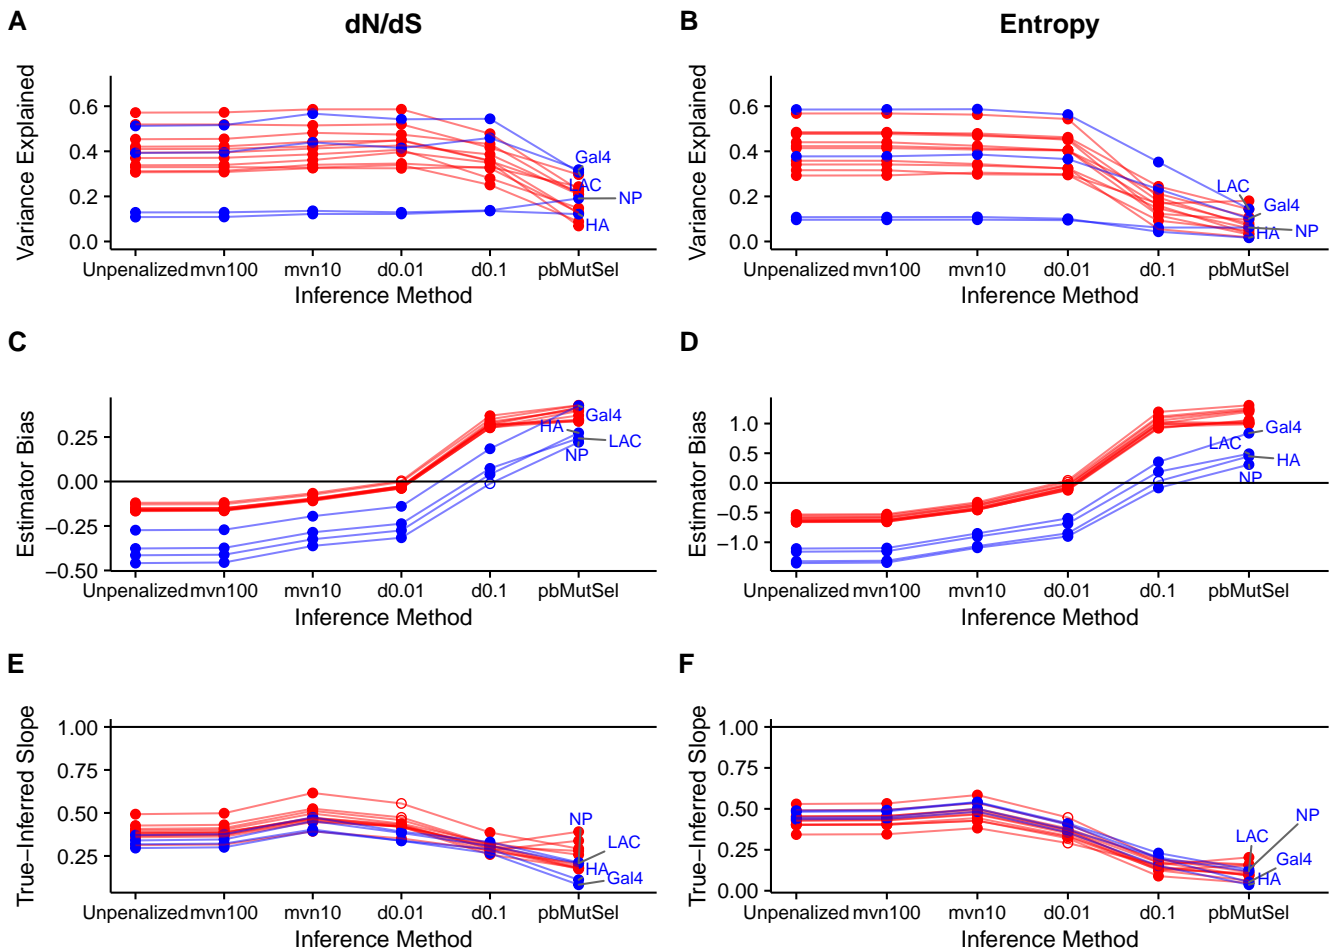

**Figure S7** Performance of mutation–selection model inference platforms for  $BL=0.01$  simulations. (A-B)  $r^2$  between true and inferred  $dN/dS$  (A) and entropy (B) across inference methods, for all simulated datasets. (C-D) Estimator bias of inference methods relative to true  $dN/dS$  (C) and entropy (D) values, for all simulated datasets. Open points indicate biases that were not significantly different from 0 (Bonferroni-corrected  $P > 0.05$ , test for intercept in linear model), and solid points indicate biases that were significantly different from 0 (Bonferroni-corrected  $P < 0.05$ ). The straight line indicates an estimator bias of 0, meaning an unbiased predictor. Note that panels (C-D) use different y-axis ranges, due to the different scales between  $dN/dS$  and entropy. (E-F) Slope for the linear relationship of inferred regressed on true  $dN/dS$  (E) and entropy (F) values. Open points indicate slopes that were not significantly different from 1 (Bonferroni-corrected  $P > 0.05$ , test for slope in linear model not equal to 1), and solid points indicate biases that were significantly different from 1 (Bonferroni-corrected  $P < 0.05$ ). The straight line indicates the null slope of 1.

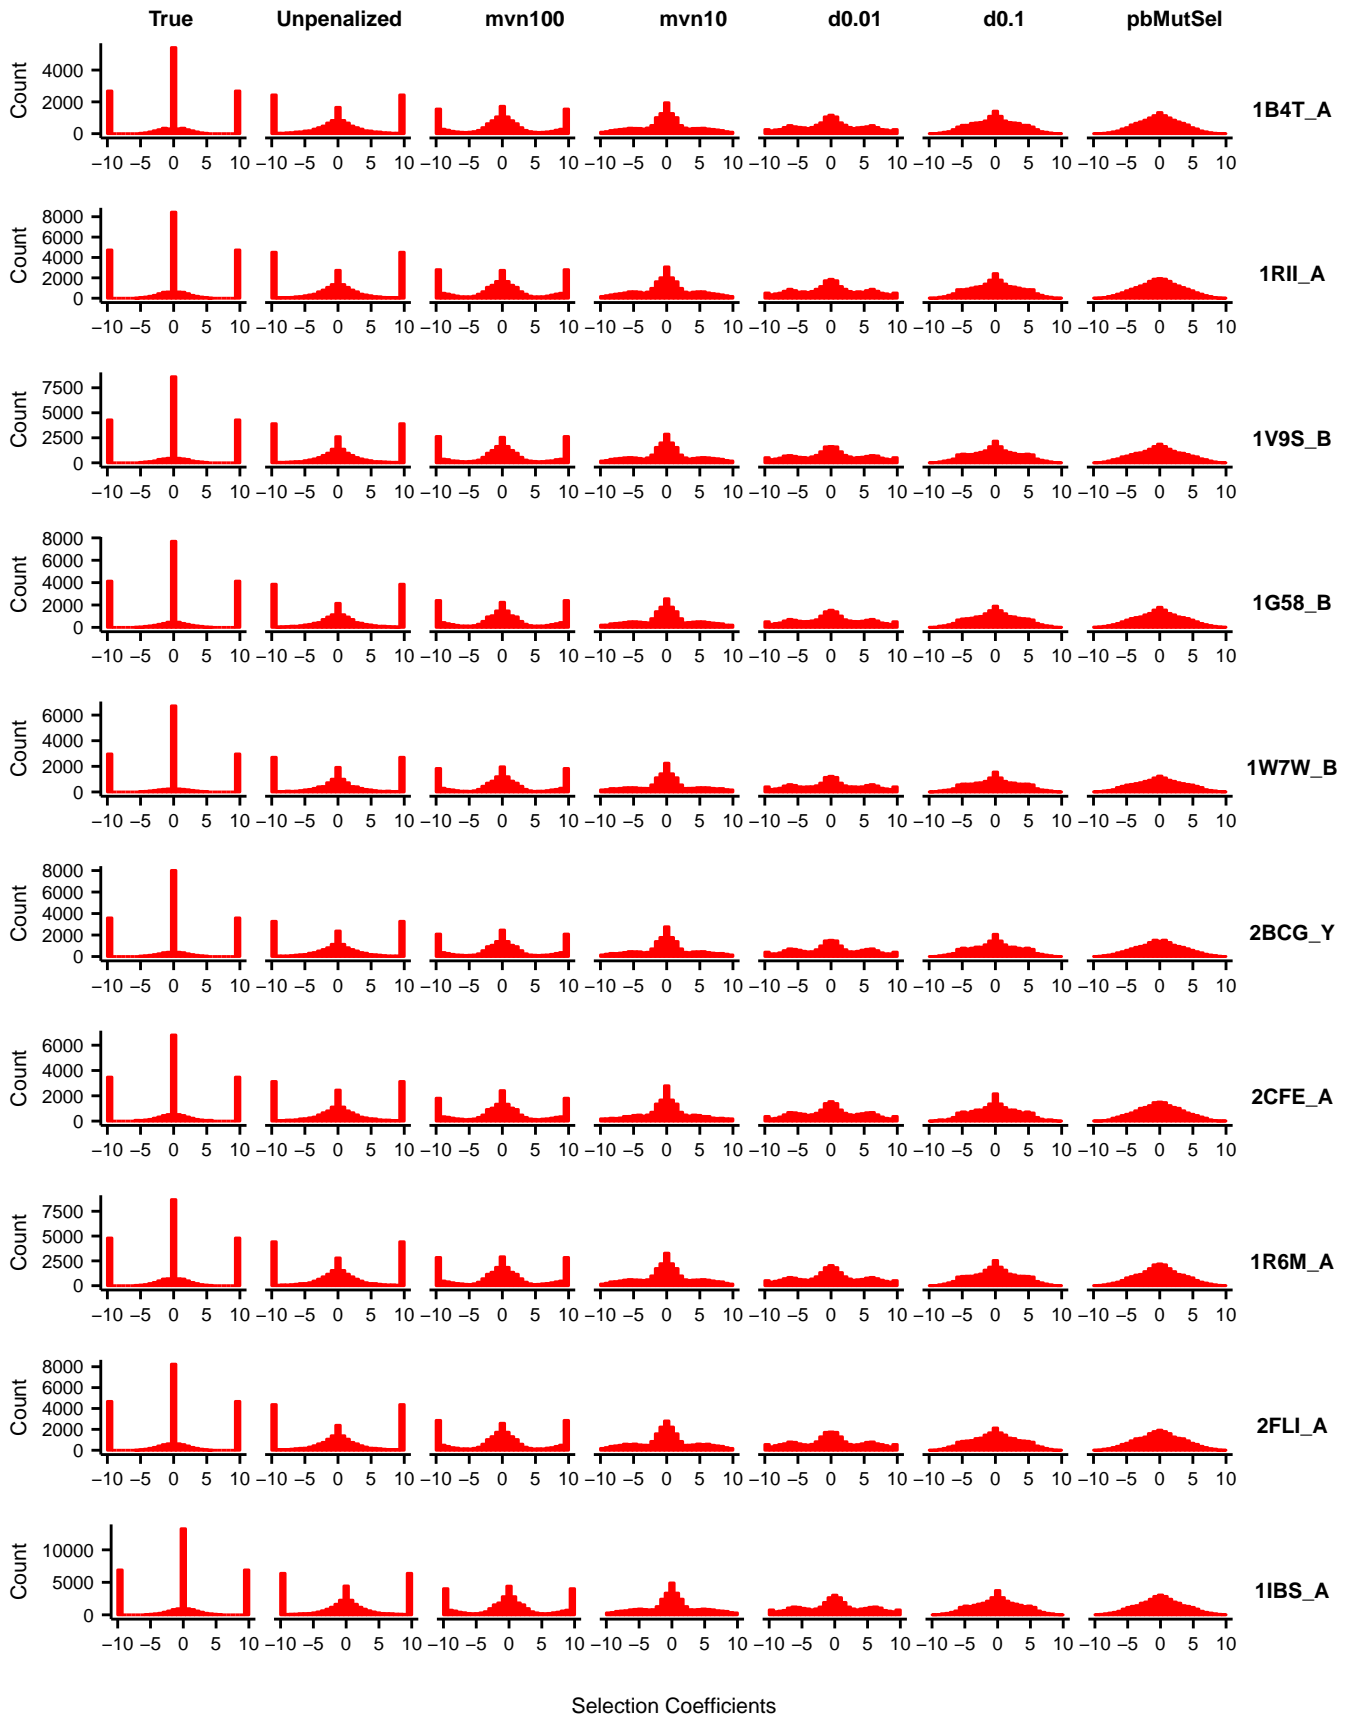

**Figure S8** Distributions of scaled selection coefficients across all inference methods, for BL=0.5 simulations not shown in Figure 6. *S* distributions shown represent the selection coefficients among all possible single-nucleotide changes, across all sites.



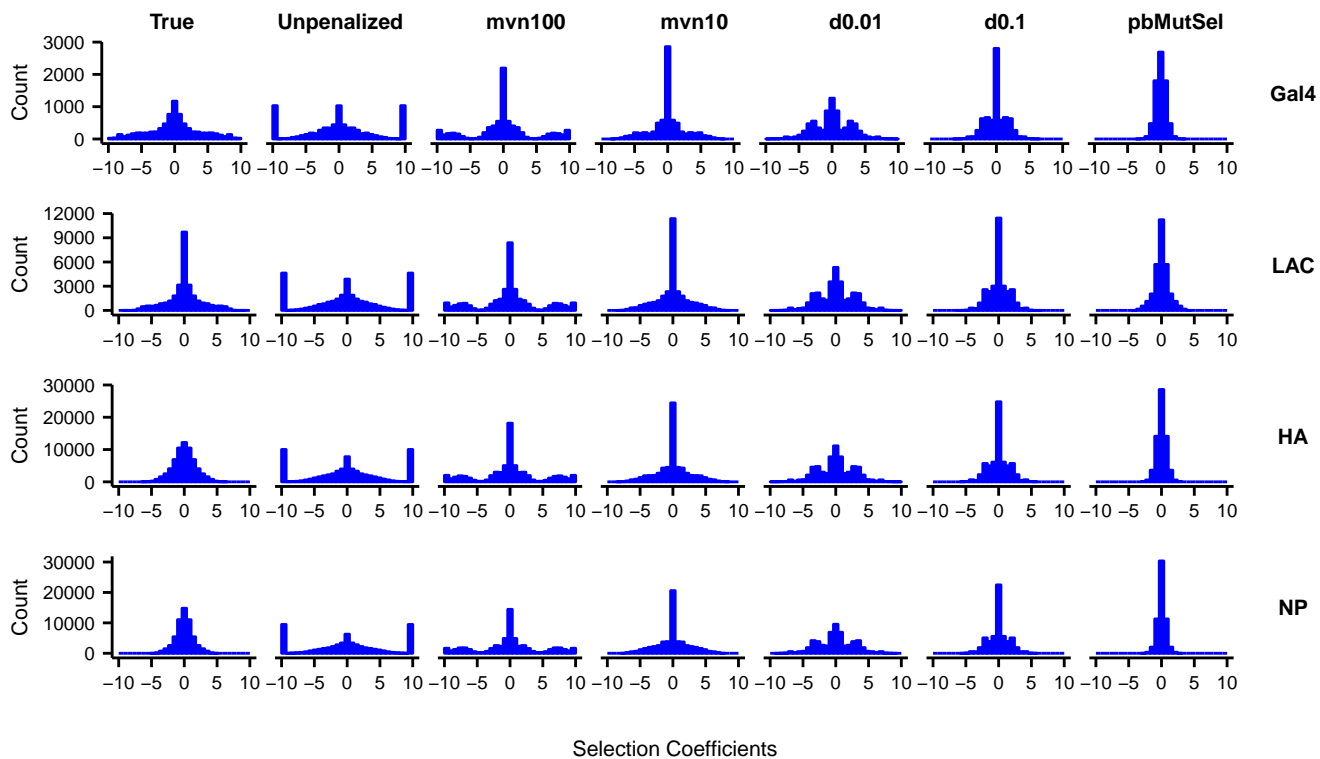

**Figure S9** Distributions of scaled selection coefficients across all inference methods, for BL=0.01 DMS simulations.  $S$  distributions shown represent the selection coefficients among all possible single-nucleotide changes, across all sites.

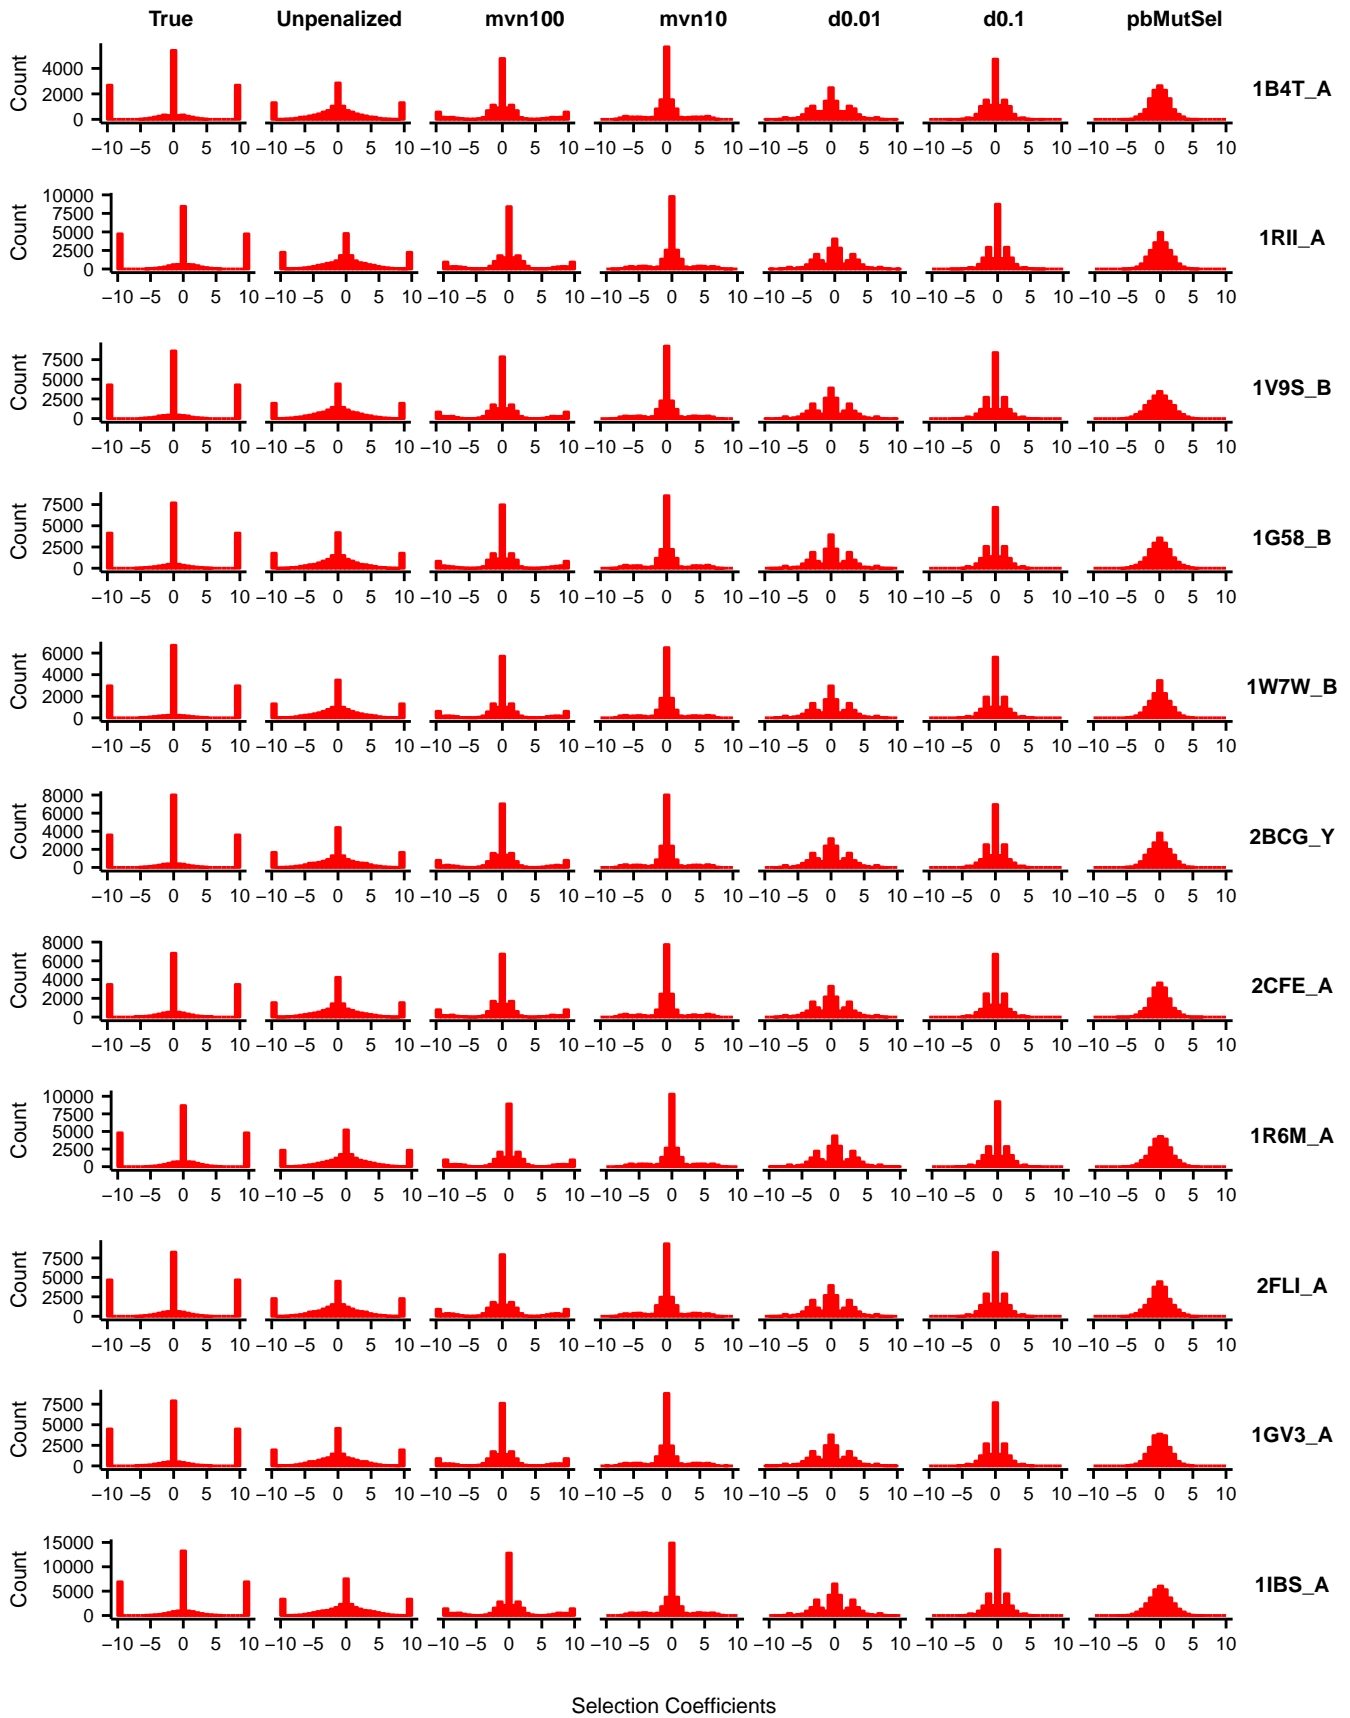

**Figure S10** Distributions of scaled selection coefficients across all inference methods, for  $BL=0.01$  natural simulations.  $S$  distributions shown represent the selection coefficients among all possible single-nucleotide changes, across all sites.
